# Supplementary material
Source: publisher figshare collection journal article supplement (https://gsajournals.figshare.com/ndownloader/files/25117043)
Supplement: Supplementary file 1 [file 25117043]

## Sheet: Sheet1
Classical Inbred Strains		Wild-derived Inbred Strains		CC		BXD
Name	Number of samples	Name	Number of samples	Name	Number of samples	Name	Number of samples
129P1/ReJ	1	BUSNA	1	CC001/Unc	3	BXD1/TyJ	1
129P2/OlaHsd	2	CALB/Rk	2	CC002/Unc	3	BXD2/TyJ	1
129P3/J	3	CAST/EiJ	4	CC003/Unc	3	BXD5/TyJ	1
129S1/SvImJ	15	CIM	2	CC004/TauUnc	3	BXD6/TyJ	2
129S2/SvHsd	4	CKN	1	CC005/TauUnc	3	BXD8/TyJ	1
129S2/SvPasOrlRj	6	CZECHI/EiJ	3	CC006/TauUnc	3	BXD9/TyJ	1
129S4/SvJaeJ	5	CZECHII/EiJ	4	CC007/Unc	3	BXD11/TyJ	1
129S6/SvEvTac	12	IS/CamRkJ	3	CC008/GeniUnc	3	BXD12/TyJ	1
129T2/SvEmsJ	6	JF1/Ms	4	CC009/Unc	3	BXD13/TyJ	1
129X1/SvJ	5	LEWES/EiJ	1	CC010/GeniUnc	3	BXD14/TyJ	1
A/J	10	MAI	1	CC011/Unc	3	BXD15/TyJ	1
A/JCr	6	MBS	1	CC012/GeniUnc	3	BXD16/TyJ	1
A/JOlaHsd	7	MDH	1	CC013/GeniUnc	3	BXD18/TyJ	2
A/WySnJ	3	MOLC/Rk	1	CC015/Unc	3	BXD19/TyJ	1
AKR/J	3	MOLD/Rk	1	CC016/GeniUnc	3	BXD20/TyJ	1
ALR/LtJ	1	MOLF/EiJ	3	CC017/Unc	3	BXD21/TyJ	1
ALS/LtJ	3	MOLG/Dn	1	CC018/Unc	3	BXD22/TyJ	1
B6N-Tyr<c-Brd>/BrdCrCrl	6	MPB	1	CC019/TauUnc	3	BXD27/TyJ	1
BALB/cAnNCrl	6	MSM/MsJ	3	CC020/GeniUnc	3	BXD28/TyJ	1
BALB/cAnNHsd	7	PERA/EiJ	3	CC021/Unc	3	BXD29/TyJ	1
BALB/cByJ	6	PERC/EiJ	3	CC022/GeniUnc	3	BXD31/TyJ	1
BALB/cByJRj	6	PWD/PhJ	3	CC023/GeniUnc	3	BXD33/TyJ	1
BALB/cJ	6	PWK/PhJ	9	CC024/GeniUnc	3	BXD34/TyJ	1
BALB/cJBomTac	6	RBA/DnJ	2	CC025/GeniUnc	3	BXD38/TyJ	1
BDP/J	3	RBF/DnJ	1	CC026/GeniUnc	3	BXD39/TyJ	1
BTBR T<+> Itpr3<tf>/J	3	SF/CamEiJ	3	CC027/GeniUnc	3	BXD42/TyJ	1
BUB/BnJ	3	SFM	2	CC028/GeniUnc	3	BXD43/RwwJ	1
C3H/HeJ	7	SMZ	2	CC029/Unc	3	BXD44/RwwJ	1
C3H/HeNCrl	6	SPRET/EiJ	2	CC030/GeniUnc	3	BXD45/RwwJ	1
C3H/HeNHsd	6	TIRANO/EiJ	3	CC031/GeniUnc	3	BXD48/RwwJ	1
C3H/HeNRj	6	WMP/Pas	2	CC032/GeniUnc	3	BXD49/RwwJ	1
C3H/HeNTac	7	WSB/EiJ	9	CC033/GeniUnc	3	BXD50/RwwJ	1
C3H/HeOuJ	3	XBS	1	CC035/Unc	3	BXD51/RwwJ	1
C3HeB/FeJ	4	ZALENDE/EiJ	3	CC036/Unc	3	BXD55/RwwJ	1
C57BL/10J	4			CC037/TauUnc	3	BXD56/RwwJ	1
C57BL/10ScCr	3			CC038/GeniUnc	3	BXD60/RwwJ	1
C57BL/10ScNHsd	5			CC039/Unc	3	BXD61/RwwJ	1
C57BL/10ScSnJ	3			CC040/TauUnc	3	BXD62/RwwJ	1
C57BL/10SnJ	5			CC041/TauUnc	3	BXD65/RwwJ	1
C57BL/6ByJ	5			CC042/GeniUnc	3	BXD66/RwwJ	1
C57BL/6J	19			CC043/GeniUnc	3	BXD68/RwwJ	1
C57BL/6JBomTac	6			CC044/Unc	3	BXD69/RwwJ	1
C57BL/6JEiJ	5			CC045/GeniUnc	3	BXD70/RwwJ	1
C57BL/6JOlaHsd	4			CC046/Unc	3	BXD73/RwwJ	1
C57BL/6NCrl	5			CC047/Unc	3	BXD75/RwwJ	1
C57BL/6NHsd	5			CC049/TauUnc	3	BXD77/RwwJ	1
C57BL/6NJ	6			CC050/Unc	3	BXD83/RwwJ	1
C57BL/6NRj	6			CC051/TauUnc	3	BXD90/RwwJ	1
C57BL/6NTac	1			CC052/GeniUnc	3	BXD98/RwwJ	1
C57BLKS/J	3			CC053/Unc	3
C57BR/cdJ	3			CC055/TauUnc	3
C57L/J	4			CC056/GeniUnc	3
C58/J	2			CC057/Unc	3
CBA/CaHN-Btk<xid>/J	3			CC058/Unc	3
CBA/J	3			CC059/TauUnc	3
DBA/1J	6			CC060/Unc	3
DBA/1LacJ	6			CC061/GeniUnc	3
DBA/1OlaHsd	6			CC062/Unc	3
DBA/2J	4			CC063/Unc	3
DBA/2JOlaHsd	6			CC065/Unc	3
DBA/2JRj	3			CC068/TauUnc	3
DBA/2NCrl	6			CC070/TauUnc	3
DBA/2NTac	6			CC071/TauUnc	3
DDK/Pas	4			CC072/TauUnc	3
FVB/NCrl	6			CC074/Unc	3
FVB/NHsd	5			CC076/Unc	3
FVB/NJ	6			CC078/TauUnc	3
FVB/NRj	6			CC079/TauUnc	3
FVB/NTac	6			CC080/TauUnc	3
HRS/J	3			CC081/Unc	3
KK/HlJ	3			CC082/Unc	3
LG/J	3			CC083/Unc	3
LP/J	3
MRL/MpJ	3
NOD/MrkTac	7
NOD/ShiLtJ	10
NON/ShiLtJ	3
NOR/LtJ	2
NU/J	3
NZB/BlNJ	3
NZO/HlLtJ	11
NZW/LacJ	3
PN/uBswUmaby	2
SJL/J	3
SM/J	2
SWR/J	3
